# Supplementary material for: High and selective CO2 uptake in a nitrogen-rich pillar-layered metal organic framework
Source: Royal Society of Chemistry journal article supplement (doi:10.1039/c5ra22144g), 2015-01-01
Supplement: c5ra22144g1.pdf [file c5ra22144g1.pdf]

## Supplementary Information

### High and selective CO<sub>2</sub> uptake in a nitrogen-rich pillar-layered metal organic framework

Chao Chen\*, Minfeng Jia, Gang Wang, Xiaoli Li and Shimin Li

*College of Chemistry and Chemical Engineering, Xinyang Normal University, Xinyang, Henan province, China, 464000*

E-mail: chenchao@xynu.edu.cn, Tel.: 86 376 6393906

**Material synthesis:** Co(Imda) (4, 4'-bpy) was synthesized referring to the method of Li et al.<sup>13</sup> A mixture of NaOH (1.50 mmol) in H<sub>2</sub>O (5.0 ml), 4, 5-imidazole dicarboxylic acid (1.0 mmol) and 4, 4'-bipyridyl (1.0 mmol) was added to an aqueous solution (5.0 ml) of Co(NO<sub>3</sub>)<sub>2</sub>•6H<sub>2</sub>O (1.5 mmol) and stirred. The resulting solution was kept statically under autogenous pressure at 180 °C for 3 days in a teflon-lined autoclave. The resultant solid was isolated by filtration and washed with deionized water.

**Characterization methods:** Powder X-ray powder diffraction (XRD) measurement was conducted using CuK $\alpha$  ( $\lambda=1.54$  Å) radiation on a Rigaku diffractometer. The N<sub>2</sub> adsorption-desorption measurements were carried out on a BEL adsorption instrument (BELsorp(II)-Max) at 77 K. The surface areas of the samples were calculated using the Brunauer–Emmett–Teller (BET) method. Thermogravimetric analysis (TGA) was carried out on a SCINCO thermal gravimeter S-1000. Scanning electron microscopy (SEM) was carried out using a Hitachi S-4200 instrument to observe particle morphologies.

**CO<sub>2</sub> or N<sub>2</sub> adsorption-desorption measurements:** Equilibrium CO<sub>2</sub> and N<sub>2</sub> adsorption isotherms at 298 K were obtained using a BEL adsorption instrument (BELsorp(II)-mini) using ultra high purity gases (U-Sung, 99.999%). The samples were pretreated under high vacuum at 150 °C overnight before the measurement.

The TGA unit was used to perform the cyclic CO<sub>2</sub> adsorption-desorption runs. High purity CO<sub>2</sub> (99.999%, U-Sung) and 15% CO<sub>2</sub> (85% N<sub>2</sub> as balance gas, U-Sung) were used as adsorption gases, while argon (Ultra high purity, 99.999%, U-Sung) was used as purge gas in the desorption process. The feed gas flow rate was maintained to 30 mL/min using a mass flow controller. Both adsorption and desorption experiments were carried out at 298 K.

**CO<sub>2</sub>/N<sub>2</sub> selectivity calculation:** CO<sub>2</sub>/N<sub>2</sub> selectivity was calculated using Ideal Adsorbed Solution Theory (IAST) method [19,20]. The absolute CO<sub>2</sub> loading was fitted with a dual-site Langmuir model, while the N<sub>2</sub> loading was fitted with a single-site Langmuir model. Both adjusted R<sup>2</sup> values of fitting exceed 0.9998. The single-site Langmuir model can be defined as,

$$q = q_{\text{sat}} b p / (1 + b p)$$

The dual-site Langmuir model can be defined as,

$$q = q_A + q_B = q_{\text{sat},A} b_A p / (1 + b_A p) + q_{\text{sat},B} b_B p / (1 + b_B p)$$

Where, q is molar loading of adsorbate; q<sub>sat</sub> is saturation loading; b is parameter in the pure component Langmuir adsorption isotherm, A and B is referring to two different sites. The IAST selectivity for the CO<sub>2</sub>:N<sub>2</sub> (0.15:0.85) gas mixture was calculated using following equation,

$$S = (q_1/q_2) / (p_1/p_2)$$

Where, S is the selectivity factor, q<sub>1</sub> and q<sub>2</sub> represent the adsorbed amount of CO<sub>2</sub> and N<sub>2</sub>, and p<sub>1</sub> and p<sub>2</sub> represents the partial pressure of CO<sub>2</sub> and N<sub>2</sub>.

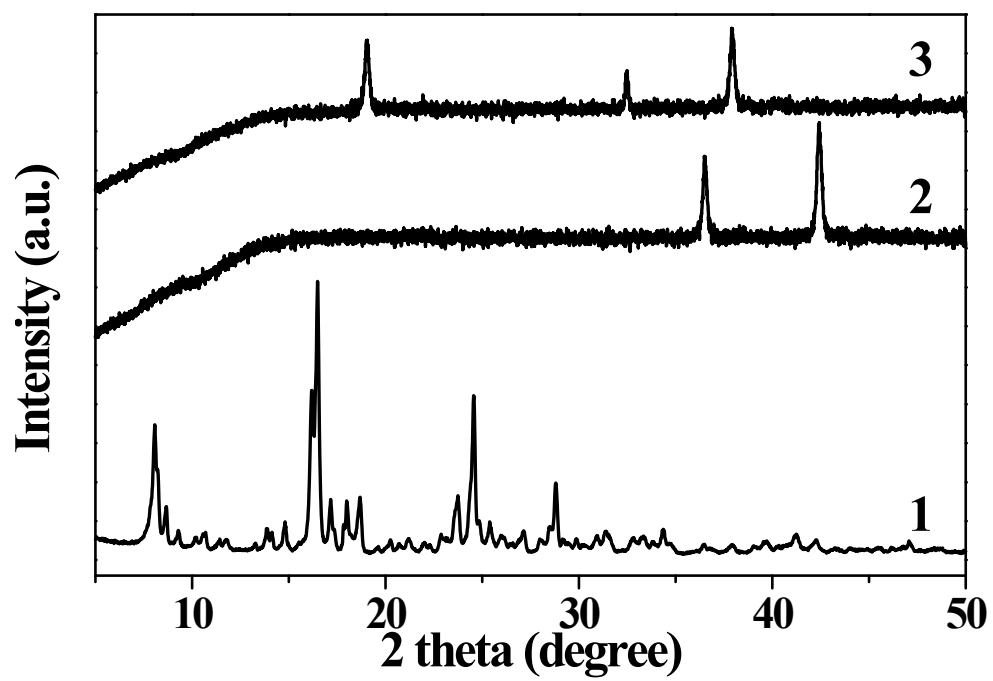

**Fig. S1:** A comparison of XRD patterns of 1) Co(Imda) (4, 4'-bpy), 2) CoO, and 3) Co(OH)<sub>2</sub>.

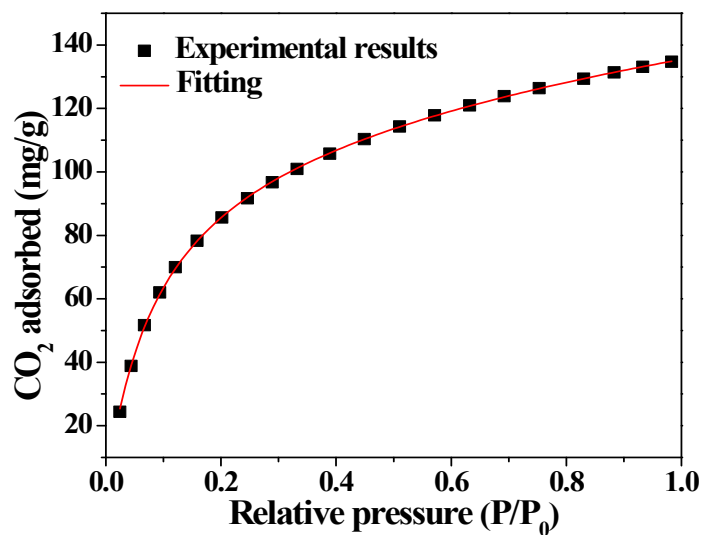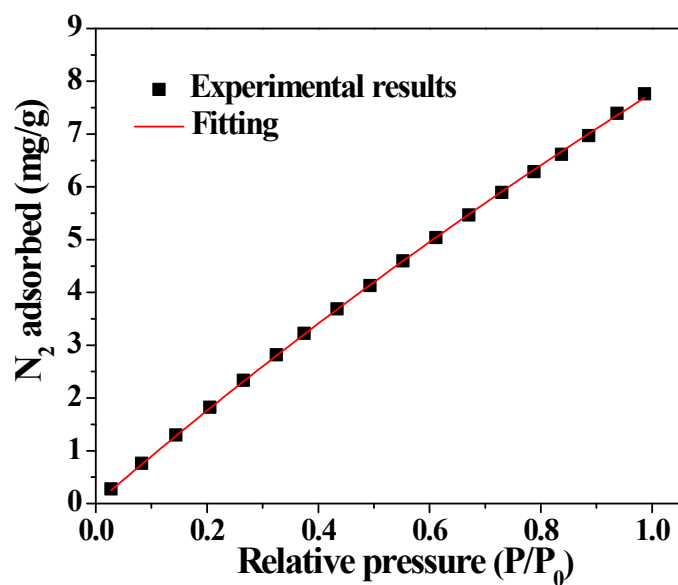

**Fig. S2:** CO<sub>2</sub> and N<sub>2</sub> adsorption isotherms were fitted by dual-site Langmuir model and single-site Langmuir model respectively for IAST CO<sub>2</sub>/N<sub>2</sub> selectivity calculation of Co(Imda) (4, 4'-bpy).
